# Supplementary material for: Amphiphilic peptide coated superparamagnetic iron oxide nanoparticles for in vivo MR tumor imaging
Source: Royal Society of Chemistry journal article supplement (doi:10.1039/c6ra07380h), 2016-01-01
Supplement: c6ra07380h1.pdf [file c6ra07380h1.pdf]

## Supplementary Information

for

### Amphiphilic Peptide Coated Superparamagnetic Iron Oxide Nanoparticles for *in vivo* MR Tumor Imaging

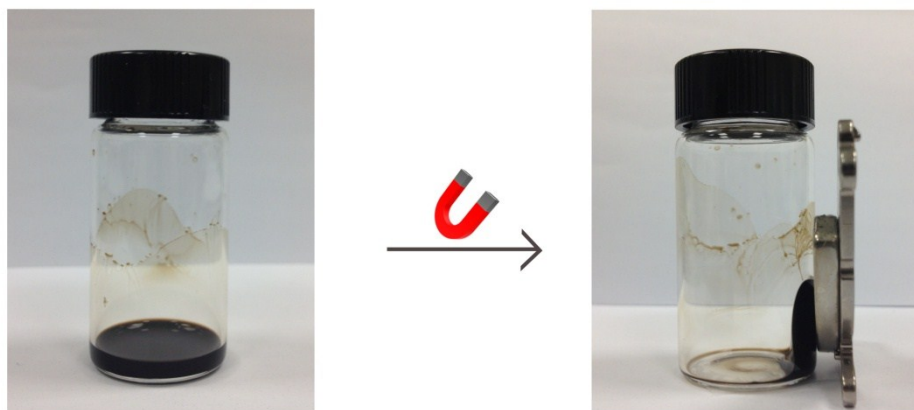

**Figure S1.** Images of hydrophobic iron oxide nanoparticles in the absence and presence of magnetic field when they are dispersed in hexane (10 mg/mL, concentration based on the iron content)

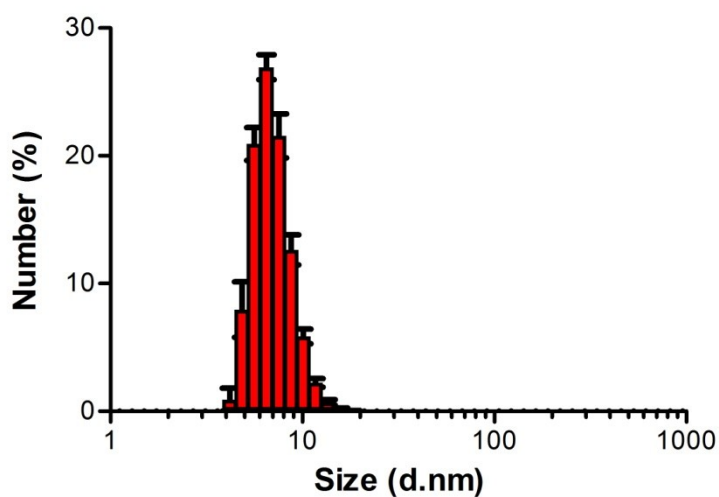

**Figure S2.** Number distribution of hydrodynamic diameter of the SPIONs dispersed in hexane.

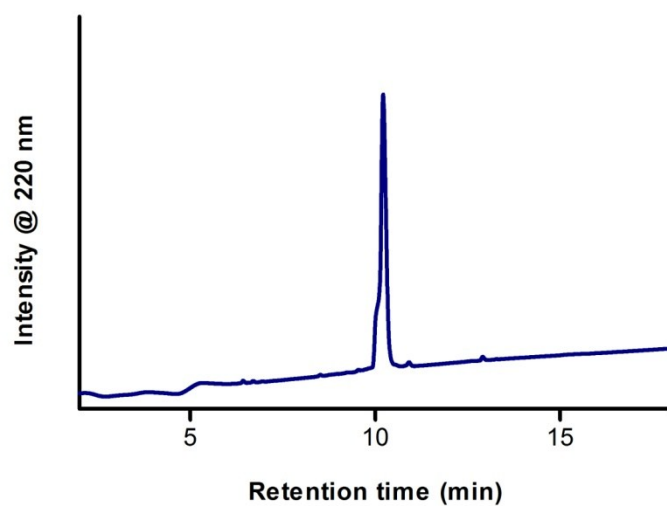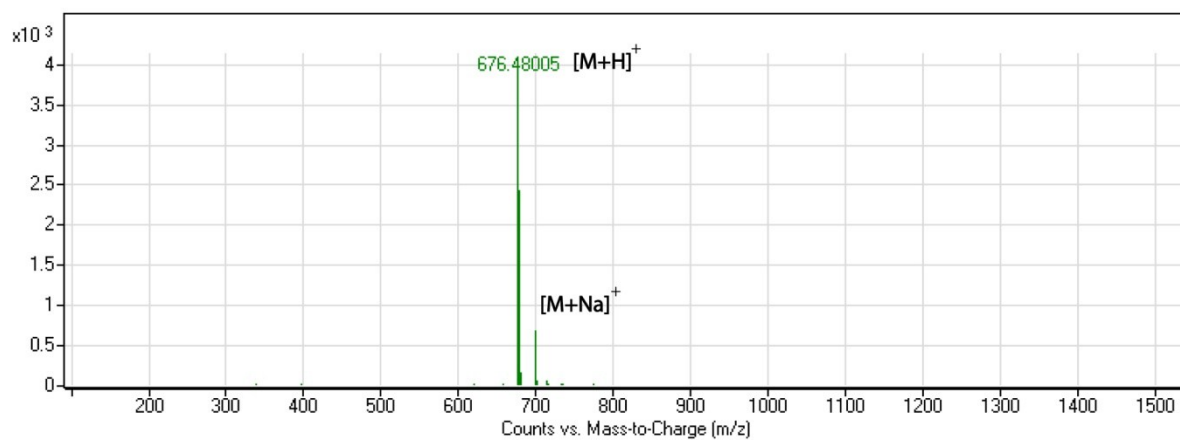

**Figure S3.** Liquid chromatogram of Lauryl-PPPGK-Am and mass spectrum of corresponding peptide amphiphile molecule. Mass data  $[M-H]^+$  (calculated) = 676.47,  $[M-H]^+$  (observed) = 676.48.

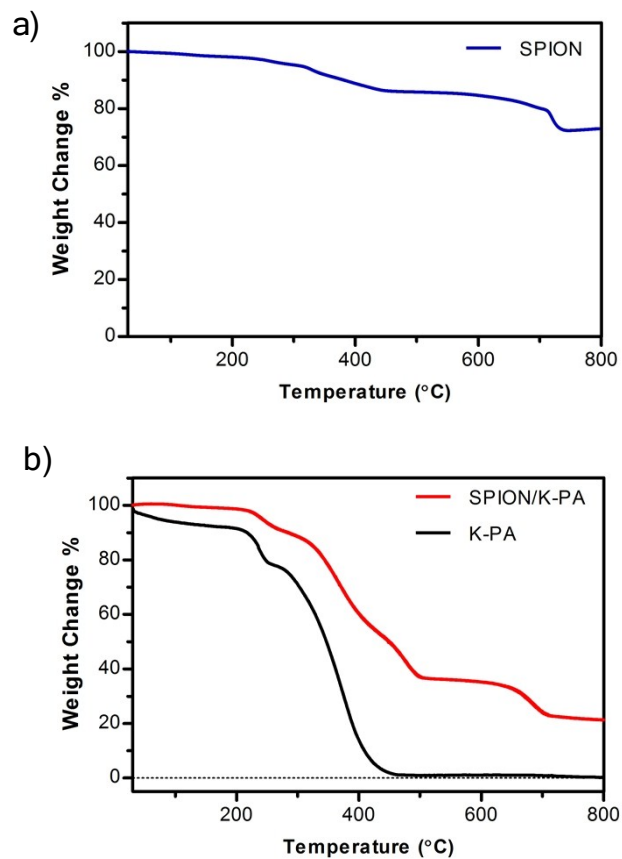

**Figure S4.** Thermal gravimetric analysis of a) SPIONs before assembly with PA, b) SPION/K-PA and peptide samples.

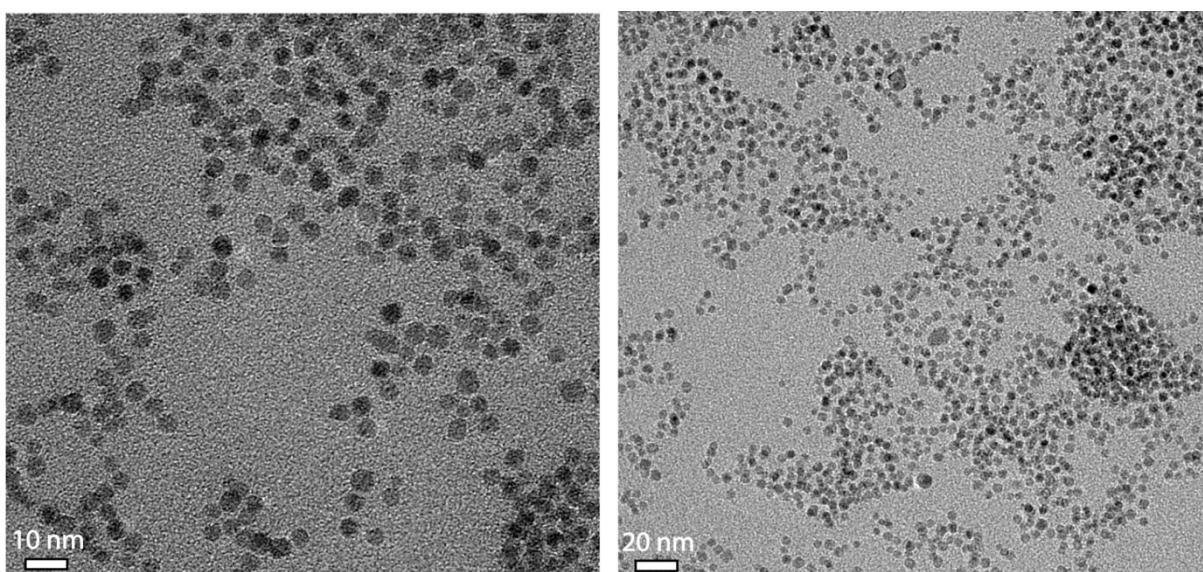

**Figure S5.** TEM images of peptide coated SPIONs, scale bars: 10 nm and 20 nm, respectively.

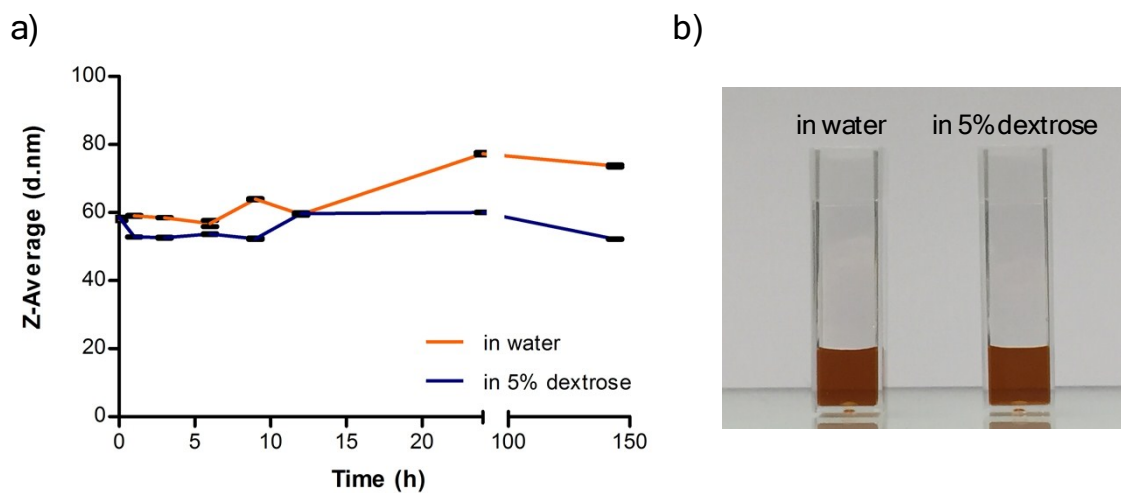

**Figure S6.** a) Dynamic light scattering (DLS) analysis to determine the dispersion stability of peptide coated SPIONs prepared in two different media, b) photographs taken after a week dispersion in corresponding media.

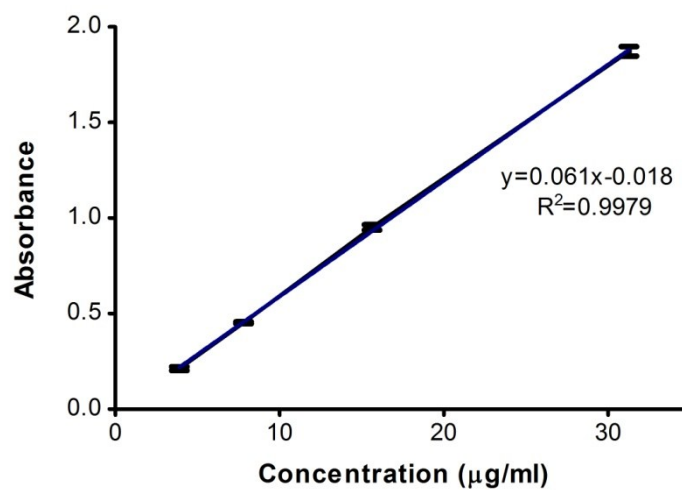

**Figure S7.** Calibration curve plotted for iron content.

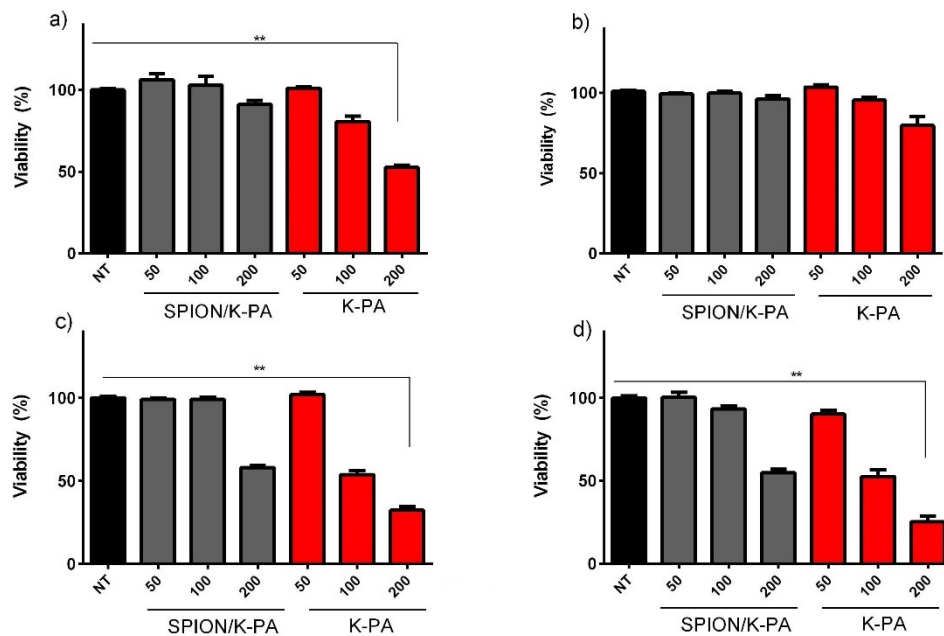

**Figure S8.** Dose-dependent cytotoxicity profiles of SPION/KPA and K-PA on different cell lines in comparison with the no-treatment group (NT). Cell viability of HUVEC (a, b), and MCF-7 cells (c, d) treated with K-PA (50-200 µg/mL which is equivalent content of iron assembled with PA) and SPION/K-PA (50-200 µg/mL) at 24 h (left column) or 48 h (right column). Values were compared to those of the untreated controls and are presented as percentages. Data represent means ± standard error of mean (SEM) of a minimum of 3 independent experiments performed in quadruplicates.

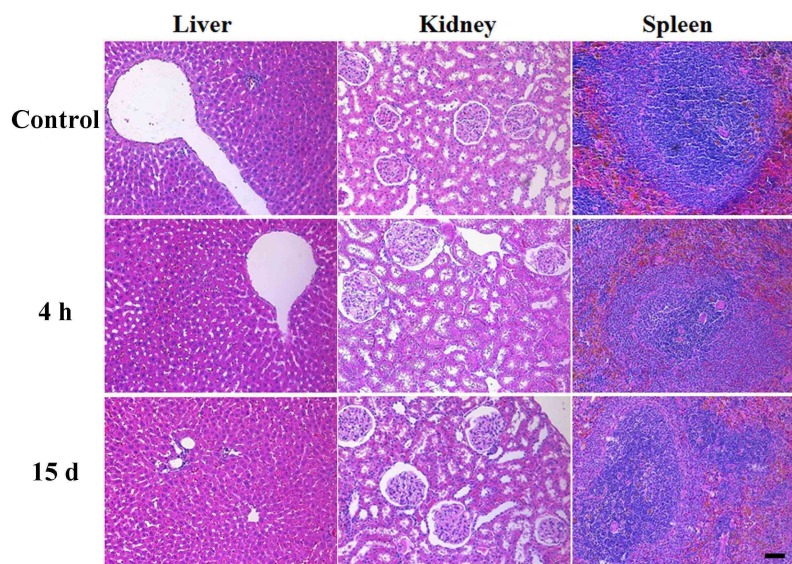

**Figure S9.** Hematoxylin-eosin staining for the tissue morphology of the kidney, liver and spleen of healthy rats (control) prior to or 4 h and 15 days following the injection of SPION/K-PA (5 mg/kg) (original magnification 200x and scale bar:50 µm).

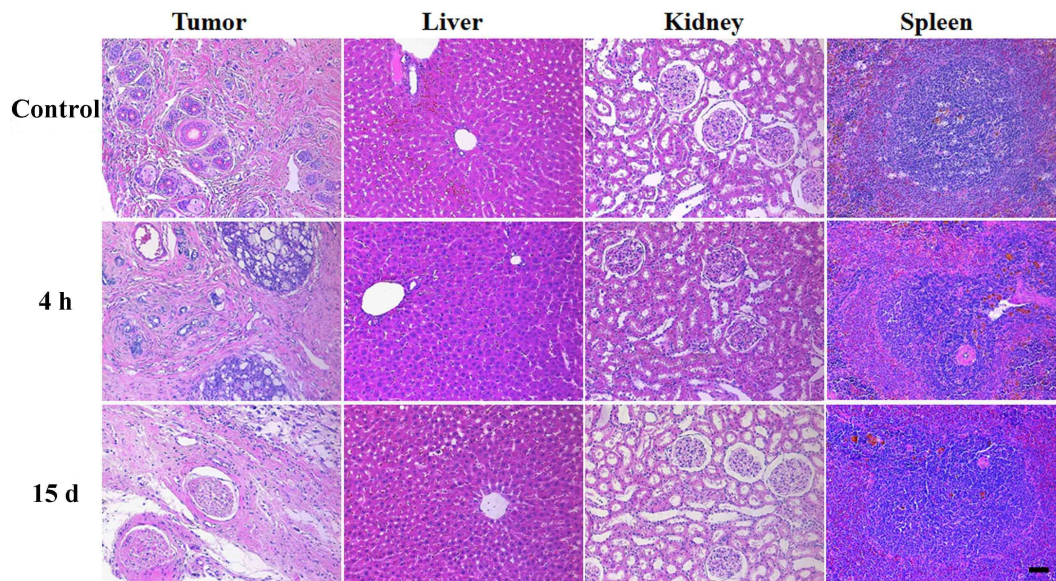

**Figure S10.** H&E staining for the tissue morphology of the kidney, liver and spleen of tumor bearing rats (control) prior to or 4 h and 15 days following the injection of SPION/K-PA (5 mg/kg). Photographs were taken at 200x magnification.

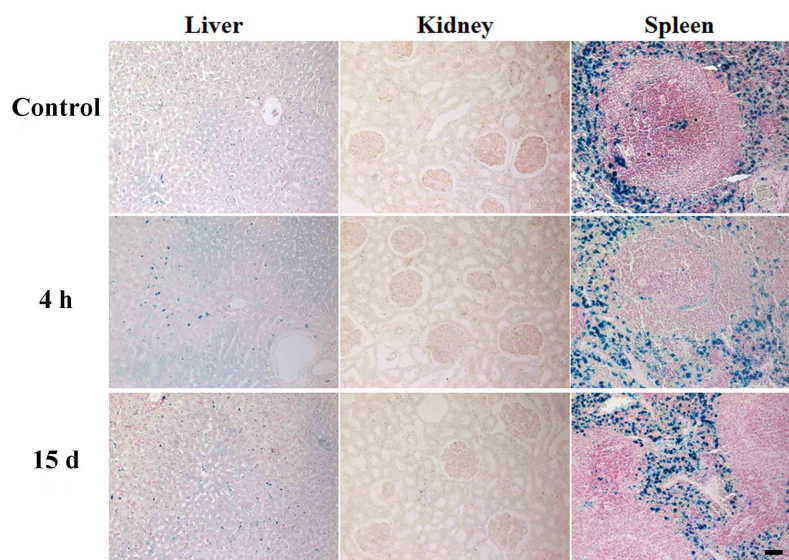

**Figure S11.** Representative photomicrographs of the liver, kidney and spleen of healthy rats (control) prior to or 4 h and 15 days following the injection of SPION/K-PA (5 mg/kg) stained with Prussian blue for iron accumulation. Positive staining appears in blue dots. (Original magnification 200x. Scale bar: 50  $\mu$ m).

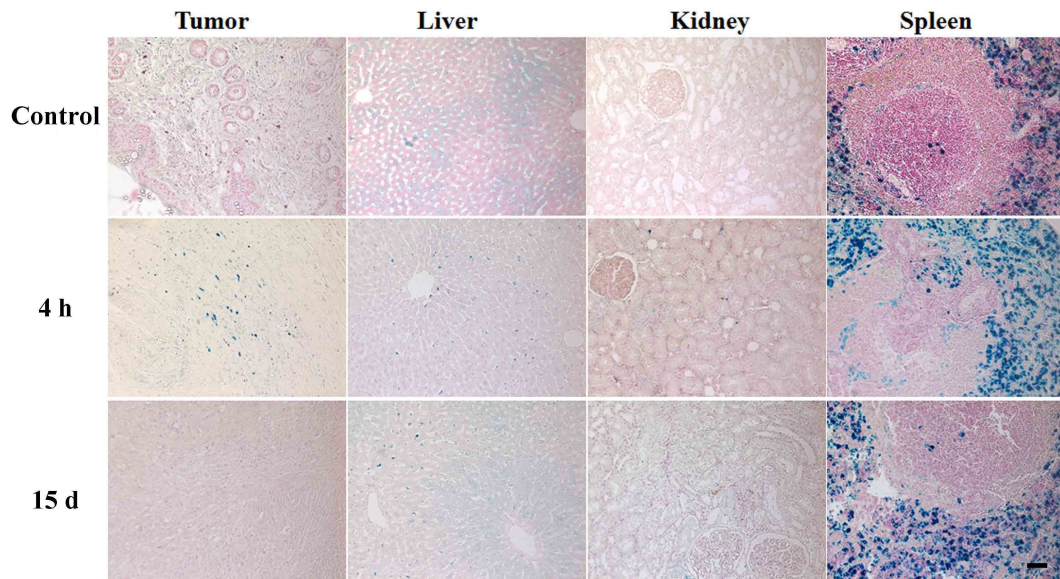

**Figure S12.** Prussian blue staining for iron accumulation in the tumor, kidney, liver and spleen of tumor bearing rats (control) prior to or 4 h and 15 days following the injection of SPION/K-PA (5 mg/kg) (original magnification 200x, scale bar is 50  $\mu$ m).

**Table S1.** The d-spacing values (nm) calculated from peak positions in XRD pattern inserted in Figure 2a and standard atomic spacing for magnetite together with respective Miller indices (*hkl*) from the JCPDS card (19-0629).

| 2 $\theta$ (degrees) | Calculated d-spacing (nm) | JCPDS data (nm) | <i>hkl</i> |
|----------------------|---------------------------|-----------------|------------|
| 30.02                | 0.2961                    | 0.2967          | 220        |
| 35.43                | 0.2524                    | 0.2532          | 311        |
| 43.11                | 0.2096                    | 0.2099          | 400        |
| 53.31                | 0.1740                    | 0.1714          | 422        |
| 57.11                | 0.1610                    | 0.1615          | 511        |
| 62.75                | 0.1479                    | 0.1484          | 440        |

**Table S2.** Physical properties of fatty acid/amine capped SPIONs and PA functionalized SPIONs (a: in water, b: in 5% dextrose, c: in hexane).

| Sample                  | TEM size (nm) | DLS size (nm)        | Zeta potential (mV) |
|-------------------------|---------------|----------------------|---------------------|
| SPION                   | 5.5±0.6       | 7.1±0.3 <sup>c</sup> | N/A                 |
| SPION/K-PA <sup>a</sup> | 5.3±0.8       | 58.0±0.7             | 18.3±1.4            |
| SPION/K-PA <sup>b</sup> | N/A           | 58.6±0.1             | 23.7±1.7            |
